# Supplementary material
Source: publisher figshare collection journal article supplement (https://acs.figshare.com/ndownloader/files/4511062)
Supplement: Supplementary file 1 [file 4511062]

Supporting information for

# Elucidating the Driving Force of Relaxation of Reaction Distribution in $\text{LiCoO}_2$ and $\text{LiFePO}_4$ Electrodes Using X-ray Absorption Spectroscopy

*Hajime Tanida<sup>\*†</sup>, Hisao Yamashige<sup>†</sup>, Yuki Orikasa<sup>‡</sup>, Yuma Gogyo<sup>‡</sup>, Hajime Arai<sup>†</sup>,  
Yoshiharu Uchimoto<sup>‡</sup>, Zempachi Ogumi<sup>†</sup>*

<sup>†</sup>Office of Society-Academia Collaboration for Innovation, Kyoto University, Japan,

<sup>‡</sup>Graduate School of Human and Environmental Studies, Kyoto University, Japan

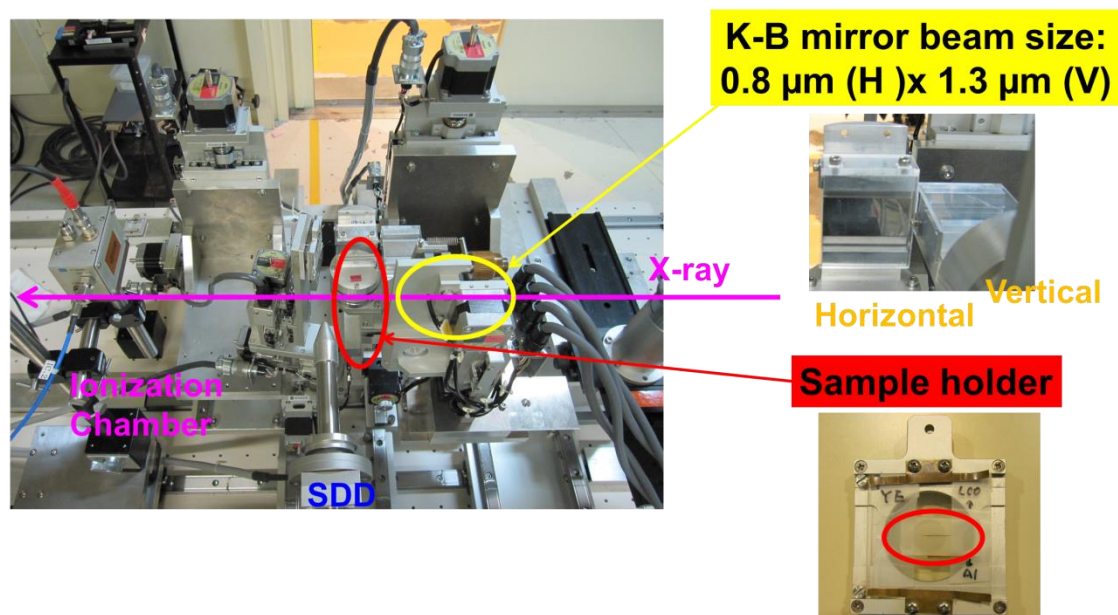

Figure S1. Figures showing the experimental setup for the micro-X-ray absorption spectroscopy measurements.

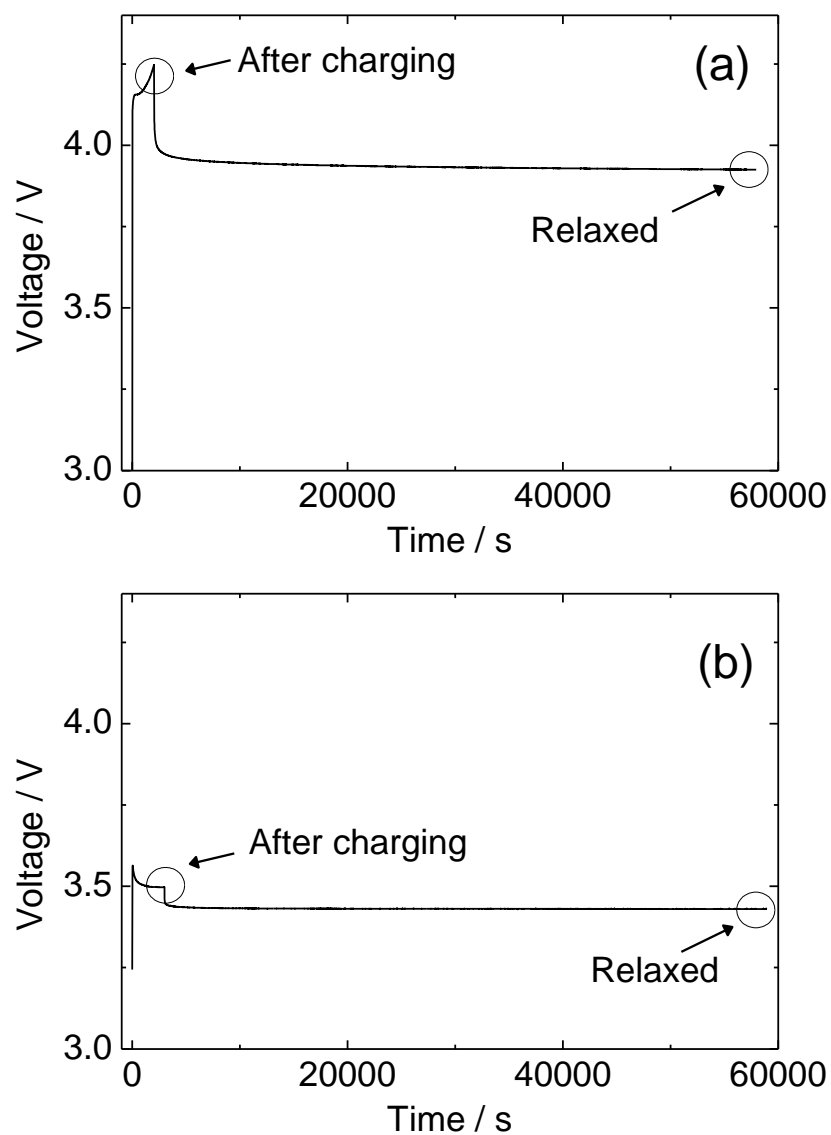

Figure S2. Voltage profiles for sample preparation of LiCoO<sub>2</sub> and LiFePO<sub>4</sub> composite electrodes.

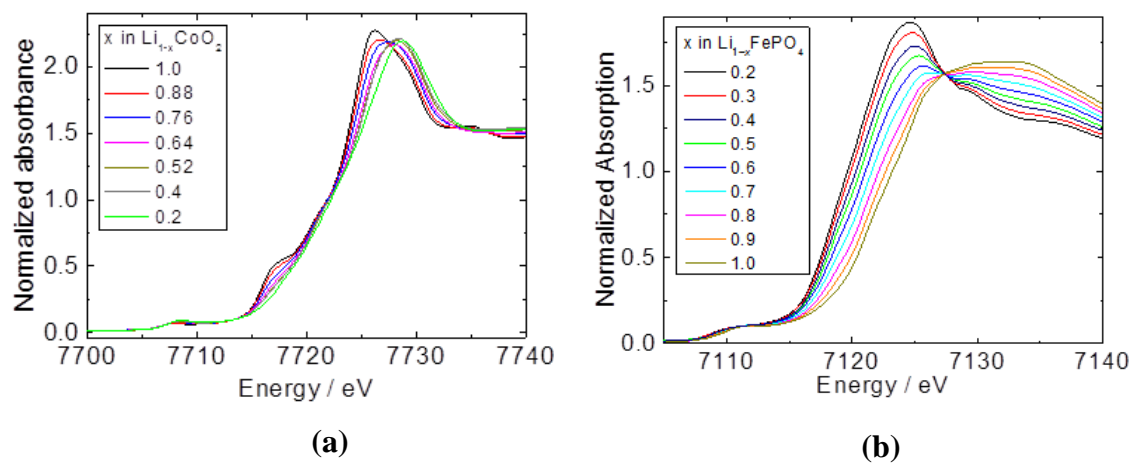

Figure S3. Co and Fe *K*-edge X-ray absorption spectra of  $\text{Li}_{1-x}\text{CoO}_2$  and  $\text{Li}_{1-x}\text{FePO}_4$ , and estimated  $x$  using normalized absorbance versus distance from current collector of  $\text{Li}_{1-x}\text{CoO}_2$  and  $\text{Li}_{1-x}\text{FePO}_4$ .

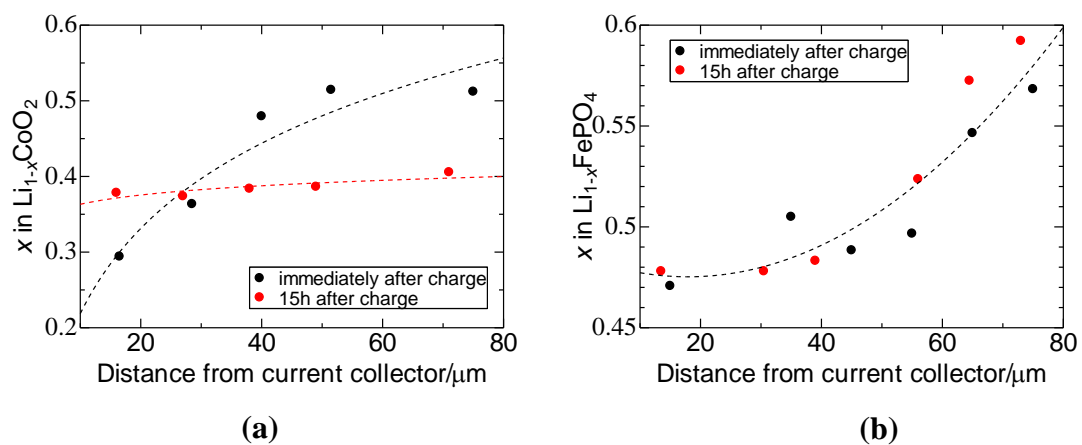

Figure S4. Estimated  $x$  using normalized absorbance versus distance from current collector of (a)  $\text{Li}_{1-x}\text{CoO}_2$  and (b)  $\text{Li}_{1-x}\text{FePO}_4$ .
